# Supplementary material for: Revealing the host antiviral protein ZAP-S as an inhibitor of SARS-CoV-2 programmed ribosomal frameshifting
Source: Research Square preprint supplement (doi:10.21203/rs.3.rs-563757/v1), 2021-06-01
Supplement: Supplementary file 1 [file 0e34637e176206da073bf394.xlsx]

## Sheet: Sheet1
ZAP-S,μM	Mean FE,%	SD	N
3	26.1771	1.02891	3
2	29.2915	5.13541	3
1.5	34.0704	1.41313	3
1	38.183	6.81485	3
0.75	40.6664	7.51444	3
0.5	44.0992	6.0742	3
0.25	53.4114	17.6038	2
0	49.8869	5.62955	3
