# Supplementary material for: Revealing the host antiviral protein ZAP-S as an inhibitor of SARS-CoV-2 programmed ribosomal frameshifting
Source: Research Square preprint supplement (doi:10.21203/rs.3.rs-563757/v1), 2021-06-01
Supplement: Supplementary file 2 [file 1e556a494965869508aed844.xlsx]

## Sheet: Sheet1
construct	mean EGFP intensity	mean mCherry intensity	mCherry/GFP	normalized to in frame control	in %	date of experiment
DF SARS-CoV-2 + ECFP	259397	101559	0.39152	0.432053	43.2053	March 2020
	258058	94312	0.365468	0.403304	40.3304
	259530	98966	0.381328	0.420806	42.0806
in frame control + ECFP	228494	212184	0.92862	1.02476	102.476
	259205	233014	0.898956	0.992023	99.2023
	258874	230651	0.890978	0.983219	98.3219
DF SARS-CoV-2 + ECFP-ZNF346 var. 2	257943	56543	0.219207	0.241901	24.1901
	258609	59132	0.228654	0.252326	25.2326
	257754	62722	0.243341	0.268533	26.8533
DF SARS-CoV-2 + ECFP-HNRNPH1 k	258302	55622	0.215337	0.23763	23.763
	258737	57742	0.223169	0.246273	24.6273
	258157	53075	0.205592	0.226876	22.6876
DF SARS-CoV-2 + ECFP-HNRNPH2	258154	48477	0.187783	0.207224	20.7224
	257666	48598	0.188609	0.208135	20.8135
	258569	48666	0.188213	0.207698	20.7698
DF SARS-CoV-2 + ECFP-NAF iso 1	257392	48842	0.189757	0.209402	20.9402
	257177	44514	0.173087	0.191006	19.1006
	256178	43827	0.17108	0.188792	18.8792
DF SARS-CoV-2 + ECFP-NHP2 iso 1	257892	48662	0.188691	0.208226	20.8226
	257198	51191	0.199033	0.219639	21.9639
	254926	48601	0.190647	0.210385	21.0385
DF SARS-CoV-2 + ECFP-POP1	259204	72238	0.278692	0.307544	30.7544
	258160	71400	0.276573	0.305206	30.5206
	258307	67054	0.25959	0.286465	28.6465
DF SARS-CoV-2 + ECFP-RAB11B	258429	47766	0.184832	0.203967	20.3967
	257878	56119	0.217618	0.240148	24.0148
	257861	51214	0.198611	0.219173	21.9173
DF SARS-CoV-2 + ECFP-TFRC	240547	52441	0.218007	0.240577	24.0577
	260641	58780	0.225521	0.248869	24.8869
	240643	47340	0.196723	0.217089	21.7089
DF SARS-CoV-2 + ECFP-ZAP-L	251738	72550	0.288196	0.318033	31.8033
	258872	70257	0.271397	0.299494	29.9494
	258565	73062	0.282567	0.311821	31.1821
DF SARS-CoV-2 + ECFP-ZAP-S	153181	27979	0.182653	0.201563	20.1563
	253278	43351	0.17116	0.18888	18.888
	259529	47045	0.181271	0.200037	20.0037
DF SARS-CoV-2 + ECFP-RSL1D1	258845	72710	0.280902	0.324148	32.4148
	259211	74401	0.287029	0.331218	33.1218
	258171	74048	0.286818	0.330974	33.0974
DF SARS-CoV-2 + ECFP-ELAVL1	259180	63586	0.245335	0.283106	28.3106
	259405	66238	0.255346	0.294657	29.4657
	258284	58445	0.226282	0.261119	26.1119
DF SARS-CoV-2 + ECFP-GNL2 iso 1	258429	89296	0.345534	0.39873	39.873
	258988	91100	0.351754	0.405907	40.5907
	259007	89886	0.347041	0.400469	40.0469
DF SARS-CoV-2 + ECFP-GNL3 isp 2 L288F	259079	92397	0.356636	0.411542	41.1542
	258764	90592	0.350095	0.403993	40.3993
	259083	92114	0.355539	0.410275	41.0275
DF SARS-CoV-2 + ECFP-MMTAG2	257602	66637	0.258682	0.298507	29.8507
	257889	70446	0.273164	0.315219	31.5219
	257701	62411	0.242184	0.279469	27.9469
DF SARS-CoV-2 + ECFP-MMTAG2 mut	257261	58708	0.228204	0.263337	26.3337
	257637	57743	0.224125	0.25863	25.863
	257218	58081	0.225805	0.260568	26.0568
DF SARS-CoV-2 + ECFP-HNRNPF	258938	87974	0.339749	0.398786	39.8786
	259454	93621	0.360839	0.42354	42.354
	259375	88162	0.339902	0.398965	39.8965
DF SARS-CoV-2 + ECFP-SSB	259179	93709	0.361561	0.424388	42.4388
	259291	94021	0.362608	0.425617	42.5617
	259023	93126	0.359528	0.422002	42.2002
DF SARS-CoV-2 + ECFP-ZNF346 var. 1	258488	80430	0.311156	0.365224	36.5224
	258803	79810	0.308381	0.361968	36.1968
	258697	80557	0.311395	0.365505	36.5505
DF SARS-CoV-2 + ECFP-ZNF346 var. 2	258832	91510	0.35355	0.414985	41.4985
	258930	86270	0.333179	0.391074	39.1074
	258945	83927	0.324111	0.380431	38.0431
DF MERS-CoV + ECFP-ZAP-S	8783085	963971	10.9753	0.300214	30.0214	February 2021
	6585835	711699	10.8065	0.295597	29.5597
	6829593	812042	11.89	0.325235	32.5235
DF MERS-CoV + ECFP	3515388	499936	14.2214	0.30963	30.963
	18956690	2920359	15.4054	0.33541	33.541
	16791476	2502391	14.9027	0.324465	32.4465
DF-SARS-CoV-1 + ECFP-ZAP-S	13589978	1374728	10.1157	0.276702	27.6702
	10561260	731092	6.92239	0.189352	18.9352
	10603207	868172	8.18782	0.223966	22.3966
DF-SARS-CoV-1 + ECFP	7528880	1459311	19.3828	0.422007	42.2007
	6287212	1001663	15.9318	0.346869	34.6869
	11028772	2218290	20.1137	0.437918	43.7918
DF SARS-CoV-2 + ECFP-ZAP-S	10478108	605285	5.77666	0.158012	15.8012
	12567166	840769	6.6902	0.183001	18.3001
	22075336	1640769	7.43259	0.203308	20.3308
DF SARS-CoV-2 + ECFP	8196020	1294715	15.7969	0.343932	34.3932
	10499843	1680457	16.0046	0.348455	34.8455
	11025461	1687905	15.3092	0.333314	33.3314
in frame control + ECFP-ZAP-S	9896362	3722692	37.6168	1.02895	102.895
	10516136	3792866	36.0671	0.986564	98.6564
	12462598	4485413	35.991	0.984482	98.4482
in frame control + ECFP	10250405	4647959	45.3441	0.987241	98.7241
	10331133	4851186	46.957	1.02236	102.236
	10628119	4834674	45.4895	0.990404	99.0404
DF CHIKV + ECFP-ZAP-S	1067904	113898	10.6656	0.291741	29.1741
	781747	85757	10.9699	0.300066	30.0066
	509836	57816	11.3401	0.310193	31.0193
DF CHIKV + ECFP	638643	82345	12.8937	0.280725	28.0725
	721474	87479	12.125	0.263988	26.3988
	739826	94155	12.7266	0.277087	27.7087
DF HIV + ECFP-ZAP-S	5913481	131890	2.23033	0.0610074	6.10074
	7453740	165717	2.22327	0.0608145	6.08145
	5522676	114332	2.07023	0.0566281	5.66281
DF HIV + ECFP	4655305	116174	2.49552	0.0543329	5.43329
	9501980	275571	2.90014	0.0631424	6.31424
	5950627	160768	2.7017	0.0588218	5.88218
DF PEG10 + ECFP-ZAP-S	3754976	268607	7.15336	0.19567	19.567
	5130039	618361	12.0537	0.329713	32.9713
	9086720	1384987	15.2419	0.41692	41.692
DF PEG10 + ECFP	4875455	716271	14.6914	0.319863	31.9863
	1228627	148540	12.0899	0.263224	26.3224
	706081	73274	10.3776	0.225942	22.5942
DF Bat-CoV-273 + ECFP-ZAP-S	9739397	1706469	17.5213	0.47927	47.927
	9621544	1800088	18.7089	0.511756	51.1756
	6205911	1004235	16.1819	0.442633	44.2633
DF Bat-CoV-273 + ECFP-ZAP-S	5414663	1204445	22.2441	0.484303	48.4303
	386550	73580	19.0351	0.414434	41.4434
	298132	39302	13.1828	0.287017	28.7017
DF WNV + ECFP-ZAP-S	8130395	1332398	16.3879	0.448267	44.8267
	7009966	1209413	17.2528	0.471925	47.1925
	8113504	1350344	16.6432	0.45525	45.525
DF WNV + ECFP	7695173	1417388	18.4192	0.401026	40.1026
	9024732	1834141	20.3235	0.442487	44.2487
	6939295	1309032	18.864	0.410711	41.0711
DF JEV + ECFP-ZAP-S	3321109	744327	22.412	0.613048	61.3048
	2022331	433515	21.4364	0.586362	58.6362
	2427277	549865	22.6536	0.619656	61.9656
DF JEV + ECFP	2872711	747637	26.0255	0.566631	56.6631
	2769127	761505	27.4998	0.598731	59.8731
	3065874	824374	26.8887	0.585426	58.5426
