# Supplementary material for: Revealing the host antiviral protein ZAP-S as an inhibitor of SARS-CoV-2 programmed ribosomal frameshifting
Source: Research Square preprint supplement (doi:10.21203/rs.3.rs-563757/v1), 2021-06-01
Supplement: Supplementary file 3 [file 4cf11eb92f5c98cd7f33730a.xlsx]

## Sheet: Plasmids
Plasmids used in this study
purpose	plasmid name	plasmid sequence	Source
Dual-fluorescence	pDF control 100%	https://benchling.com/s/seq-Gse5mjDbvukuwRa8Yq0P	based on Addgene #87803, Pan et al., 2017
	pDF control 0%	https://benchling.com/s/seq-t1RJan0v5VnDLrBvrsoj	this study
	pDF mCherry only	https://benchling.com/s/seq-Gp2805HLTAsXyV0fWIYs
	pDF SARS-CoV-2	https://benchling.com/s/seq-b4Bre2h8yP4FsXutyag5
	pDF Bat CoV 273	https://benchling.com/s/seq-FAuqAIVN3wtBNKrwxpts
	pDF SARS-CoV-1	https://benchling.com/s/seq-kiOVzgp5G1u9DPTYYGVf
	pDF MERS-CoV	https://benchling.com/s/seq-geZsDtnqJYEI0ACwzxYO
	pDF PEG10	https://benchling.com/s/seq-AUnVPIYF8GxqU7PssCAW
	pDF CHIKV	https://benchling.com/s/seq-jzZnZFedXmzJACGsVCcS
	pDF HIV	https://benchling.com/s/seq-zvSyu6wAU0HiT20rCcvh
	pDF JEV	https://benchling.com/s/seq-8srhi6JMNtvucTMV4RNz
	pDF WNV	https://benchling.com/s/seq-NhAblSZoP77EqrX5V5to
Pulldown	pPD control	https://benchling.com/s/seq-rRdGlv0f5uA8hckoi5Ya
Functional screen	pScreenBB	https://benchling.com/s/seq-QZf7LrY20lPsW0HxbXtM	based on pFlp-Bac-to-Mam, Meyer et al., 2013
	pScreen-DDX36	https://benchling.com/s/seq-NrdpoCVTHe8eU8V90spK	this study
	pScreen-ELAVL1	https://benchling.com/s/seq-8JU1rV9cKLlL7MudpJzn
	pScreen-GNL2	https://benchling.com/s/seq-VJlSIFXbPeSNRVN4Z51d
	pScreen-HNRNPF	https://benchling.com/s/seq-c9MP2A4DsXCGDIWQ8Xvy
	pScreen-HNRNPH1	https://benchling.com/s/seq-2CGJNMmR2FH0Sbz8hKa0
	pScreen-HNRNPH2	https://benchling.com/s/seq-V0gXv1qkysqXIfbhKSjd
	pScreen-IGF2BP1	https://benchling.com/s/seq-ep2o0gvgYAv8s2yY6aDs
	pScreen-MMTAG2 iso 1	https://benchling.com/s/seq-er75tANC2smYigTSfFl8
	pScreen-MMTAG2 iso 2
	pScreen-NAF1	https://benchling.com/s/seq-cQadWQI6Ry5P0QfTNAez
	pScreen-NHP2	https://benchling.com/s/seq-ODEf8YrCdXaNgsg1QRoy
	pScreen-POP1	https://benchling.com/s/seq-3gzSny6Ufn647wEvvU2C
	pScreen-RAB11B	https://benchling.com/s/seq-FnL76LBzXwD8iTP0M0iY
	pScreen-RSL1D1	https://benchling.com/s/seq-6woz9v1ZPxyesCxLuZ2r
	pScreen-SSB	https://benchling.com/s/seq-bZ97LILnQwjipTjwvyHc
	pScreen-TFRC	https://benchling.com/s/seq-DdrZzQje2hNLDk7ezmc8
	pScreen-ZAP-L	https://benchling.com/s/seq-PEmRO9HbKIfHeygynOGo
	pScreen-ZAP-S	https://benchling.com/s/seq-GnrhPyUa62TlOFduvZXl
	pScreen-ZNF346 iso 1	https://benchling.com/s/seq-HZJPsS1RzM6bAGcR9CzM
	pScreen-ZNF346 iso 2
bacterial expression	pET-SUMO BB	https://benchling.com/s/seq-0r2pKzJ9uF1zx2fM7Wt0	based on pET-SUMO-GFP, gift from Prof. Utz Fischer
	pET-SUMO-ZC3HAV1	https://benchling.com/s/seq-Od8DeLoSO2OLOxcJIR36
mammalian transient expression	pHis BB	https://benchling.com/s/seq-2d8AiPOdEohguZD0qf5l	based on Addgene #87803, Pan et al., 2017
	pHis-ZAP-S	https://benchling.com/s/seq-PPHZxylieabxuY74eKzt	this study
	pHis-SFL	https://benchling.com/s/seq-AV6eWpwhyXGOZWyPUnNV
mammalian stable expression	pLenti-ALFA-BB	https://benchling.com/s/seq-WsDjqfkIGyZAH0A2QvBa	based on gift from Dr. Chase Beisel
	pLenti-ALFA-ZAP-s	https://benchling.com/s/seq-wcGr7RGaAn5e7RlRNhID	this study
	pCMV-VSV-G	https://benchling.com/s/seq-PvubQC0R6dmaQB3iQ9cp	Steward et al., 2003
	pCMVdR 8.91	https://benchling.com/s/seq-UZWrjLP4uSGz5keOwzzc	Brennan et al., 2018

## Sheet: Oligos
DNA oligonucleotides used in this study
purpose	internal reference	sequence
cloning DF CoVs	633 df peg10 -1 fwd	CCGAAGCAGCCGCCAAAGAAGCAGCCGCCAAAGCCGaaaaggcctcaaagtcttcgcc
	634 df peg10 -1 rev	GTAGCTCCGCTTCCGCGGCCGCttTCATTAttgcccggaagatgaatctggag
	676 DF WuCoV full r	CTGTGCCGCACGGTGTAAGACGGGCTGCACTTACACCGCAAACCCGTTTAAAAACGAAACGGCTTTGGCGGCTG
	677 DF WuCoV SL1 r	GTGTAAGACGGGCTGCACTTACACCGCAAACCCGTTTAAAAACGACAACGCGGCTTTGGCGGCTG
	678 DF wuCoV full f	GCACTAGTACTGATGTCGTATACAGGGCTTTTGACATCTACAATGATAAAGTAGCTGTAATGAGCGGCCGCGGAAG
	679 DF WuCoV SL2 f	GCGGCACAGGCACTAGTACTGATGTCGTAATGAGCGGCCGCGGAAG
	680 DF WuCoV SL1f	TAATGAGCGGCCGCGGAAG
	1114 AIBV f	tggatgtgatcctgatgttgtaaagcgagcctttgatgtttgtaataaggaatcagctgTAATGAGCGGCCGCGGAAG
	1115 AIBV r	ctagcaaggggtatcagccgagcctcactgctaccccgtacccgtttaaataattctTaacGGCTTTGGCGGCTG
	1117 BtCoV273 f	acaggcactagcactgatgtcgtttacagggcttttgacatctacaacgaaaaggttgctgTAATGAGCGGCCGCGGAAG
	1118 BtCoV273 r	gccgcacggtgtaagacgggctgcacttacaccgcaaacccgtttaaaaacggtgAaacGGCTTTGGCGGCTG
	1119 BatCoV Yunnan f	caggcactagtactgatgtcgtttacagggcttttgatatttacaacgaaaaagttgctgTAATGAGCGGCCGCGGAAG
	1120 BatCoV Yunnan r	tgccgcacggtgtaagacgggctgcacttacaccgcaaacccgtttaaaaacgttgAaacGGCTTTGGCGGCTG
	1121 SARS-like Bat CoV f	caggcactagcactgatgtcgtctacagggcttttgatatttacaacgaaaaagttgctgTAATGAGCGGCCGCGGAAG
	1122 SARS-like Bat CoV r	tgccgcacggtgtaagacgggctgcacttacaccgcaaacccgtttaaaaacgttgAaacGGCTTTGGCGGCTG
	1123 beluga cov f	GGATTGTTACCTGATGTTGTTAAAAGAGCTTTTGATCTTTATAATAGCAATACAGCTGTAATGAGCGGCCGCGGAAG
	1224 beluga cov r	cgacgcacagggcctcagtcgagcttcactgagaccccgtacccgtttaaataattctGaacGGCTTTGGCGGCTG
	1225 bovine cov f	gtggtttatctactgatgtacaattaagggcatttgatatttgcaatgctagtgttgctgTAATGAGCGGCCGCGGAAG
	1226 bocine cov r	tggcacagggtacgagacgggcatctacactcgtaccccgaacccgtttaaaaaattagTaacGGCTTTGGCGGCTG
	1227 SARS-COV f	gcacaggcactagtactgatgtcgtctacagggcttttgatatttacaacgaaaaagttgTAATGAGCGGCCGCGGAAG
	1228 SARS-COV r	cgcacggtgtaagacgggctgcacttacaccgcaaacccgtttaaaaacgttgaaacGGCTTTGGCGGCTG
	1134 MERS f	agtggtttgtccactgatgtcgtctttagggcatttgacatctgcaactataaggctaaggTAATGAGCGGCCGCGGAAG
	1135 MERS r	tgaacagggttctattcgggcatttacaatagaaccccggactcgtttaaaaaattggaaacGGCTTTGGCGGCTG
cloning trans factors for screen	367 MZ_pFlpBtM f	CGC GTG CGG CCG CCT AG
	368 MZ_pFlpBtM f 2	AGC CGC CAA AGC CGC CGA GAA CCT GTA CCC CCA GAG CTA ATA ACG CGT GCG GCC GCC TAG
	369 MZ_CFP bb TEV r	GCT CTG GGG GTA CAG GTT CTC GGC
	417 SSB f	AGCCGCCGAGAACCTGTACCCCCAGAGCGCTGAAAATGGTGATAATGAAAAG
	418 SSB r	GGGGTTATGCTAGGCGGCCGCACGCGTTATTACTGGTCTCCAGCACC
	425 IGF2BP1 f	AGCCGCCGAGAACCTGTACCCCCAGAGCaacaagctttacatcggc
	426 IGF2BP1 r	ggggttatgctaggcggccgcacgcgTTATTActtcctccgtgcctg
	435 HNRNPF f	AGCCGCCGAGAACCTGTACCCCCAGAGCatgctgggccctga
	436 HNRNPF r	GGGGTTATGCTAGGCGGCCGCACGCGTTATTAGTCATAGCCACCCATGC
	498 ZNF346 f	AGCCGCCGAGAACCTGTACCCCCAGAGC Gagtatcccgcgccg
	499 ZNF346 r	ggggttatgctaggcggccgcacgcgTTATTA Gtcttccaaggtggttgag
	506 HNRNPH1 f	AGCCGCCGAGAACCTGTACCCCCAGAGC atgttgggcacggaag
	507 HNRNPH1 r	ggggttatgctaggcggccgcacgcgTTATTA cattccccatccaccac
	363 MZ_eCFP for Screen f	GAA TTA AAG GAG AGC CAC CAT GGA GCA TCA TCA TCA TCA TCA TGT GAG CAA GGG CGA G
	364 MZ_eCFP for screen r	GGC GGC TTT GGC GGC TGC TTC TTT GGC GGC TGC TTC GGA TCC CTT GTA CAG CTC GTC CAT
	766 DDX36 f (MZ)	AGCCGCCGAGAACCTGTACCCCCAGAGCAGTTATGACTACCATCAGAACTGG
	767 DDX36 r (MZ)	ggggttatgctaggcggccgcacgcgTTATTAgctgtaatatccatcctggaatcg
	768 ELAVL1 f (MZ)	AGCCGCCGAGAACCTGTACCCCCAGAGCTCTAATGGTTATGAAGACCACATGG
	769 ELAVL1 r (MZ)	GGGGTTATGCTAGGCGGCCGCACGCGTTATTATTTGTGGGACTTGTTGGTTTTGA
	770 GNL iso 1 f (MZ)	AGCCGCCGAGAACCTGTACCCCCAGAGCgtgaagcccaagtacaaaggac
	771 GNL iso 1+3 r (MZ)	GGGGTTATGCTAGGCGGCCGCACGCGTTATTACTGCTTTTGTCTGAATTTTTTGCG
	772 GNL iso 3 f (MZ)	AGCCGCCGAGAACCTGTACCCCCAGAGCatcgaatccggcctcataaatg
	773 GNL3 iso 1 f (MZ)	AGCCGCCGAGAACCTGTACCCCCAGAGCaaaaggcctaagttaaagaaagcaag
	774 GNL3 iso 2 f (MZ)	AGCCGCCGAGAACCTGTACCCCCAGAGCacctgccataagcggtataaaatc
	775 GNL3 iso 1+2 r (MZ)	GGGGTTATGCTAGGCGGCCGCACGCGTTATTACACATAATCTGTACTGAAGTCATAAGC
	779 HNRNPH2 f (MZ)	AGCCGCCGAGAACCTGTACCCCCAGAGCatgctgagcacggaagg
	780 HNRNPH2 r (MZ)	ggggttatgctaggcggccgcacgcgTTATTAagcaaggtttgactgatagtcac
	785 MMTAG2 f (MZ)	AGCCGCCGAGAACCTGTACCCCCAGAGCttcggctccagtcgtgg
	786 MMTAG2 r (MZ)	GGGGTTATGCTAGGCGGCCGCACGCGTTATTAGGCCTCAGAGCCTCTGTC
	787 NAF1 iso 1 + 2 f (MZ)	AGCCGCCGAGAACCTGTACCCCCAGAGCgaggtagtggaggccgc
	788 NAF1 iso 1 r (MZ)	ggggttatgctaggcggccgcacgcgTTATTAatagtaaggtccaaaatgagaattactatctc
	789 NAF1 iso 2 r (MZ)	GGGGTTATGCTAGGCGGCCGCACGCGTTATTATTGCATACTTAATAAACTAAAGTAGCAT
	790 NHP2 iso 1+ 2 f (MZ)	AGCCGCCGAGAACCTGTACCCCCAGAGCACCAAAATAAAGGCAGATCCCG
	791 NHP2 iso 1 r (MZ)	ggggttatgctaggcggccgcacgcgTTATTAtaggggtaggggcaggg
	792 NHP2 iso 2 r (MZ)	ggggttatgctaggcggccgcacgcgTTATTAcacaggtggggcgct
	793 POP1 f (MZ)	AGCCGCCGAGAACCTGTACCCCCAGAGCtcaaatgcaaaagaaagaaaacacgc
	794 POP1 r (MZ)	ggggttatgctaggcggccgcacgcgTTATTAcacctcaatagcaatcctcgc
	798 RAB11B f (MZ)	AGCCGCCGAGAACCTGTACCCCCAGAGCgggacccgggacgac
	799 RAB11B r (MZ)	ggggttatgctaggcggccgcacgcgTTATTAcaggttctggcagcactg
	802 RSL1D1 f (MZ)	AGCCGCCGAGAACCTGTACCCCCAGAGCgaggattcggcctcggc
	803 RSL1D1 r (MZ)	ggggttatgctaggcggccgcacgcgTTATTAggtcgactggggtactttgg
	807 TFRC f (MZ)	AGCCGCCGAGAACCTGTACCCCCAGAGCatggatcaagctagatcagcattc
	808 TFRC r (MZ)	ggggttatgctaggcggccgcacgcgTTATTAaaactcattgtcaatgtcccaaacg
	809 ZC3HAV1 iso 1+3 f (MZ)	AGCCGCCGAGAACCTGTACCCCCAGAGCgcggacccggaggtg
	810 ZC3HAV1 iso 1 +3 r (MZ)	ggggttatgctaggcggccgcacgcgTTATTAactaatcacgcaggctttgtc
	811 ZC3HAV1 iso 2 f (MZ)	AGCCGCCGAGAACCTGTACCCCCAGAGCgcggacccggaggtg
	812 ZC3HAV1 iso 2 r (MZ)	ggggttatgctaggcggccgcacgcgTTATTActctggccctctcttcatct
	813 ZNF768 f (MZ)	AGCCGCCGAGAACCTGTACCCCCAGAGCgagcgggaggcgttgccgtggg
	814 ZNF768 r (MZ)	GGGGTTATGCTAGGCGGCCGCACGCGTTATTAGCGCCGGCCCGCCGC
	815 DDX36 seq int (MZ)	tatgtggctcaacgggtaatcg
	816 GNL2 seq int (MZ)	gagcattcattcagcttctgcg
	817 MATR3 seq int (MZ)	ctcatttcatcttgggggacca
	818 POP1 seq int (MZ)	tgccagtgtgtggaaccc
	819 ZC3HAV1 seq int (MZ)	cacaactcattacccgaaaattg
subcloning TFs via GG	911 ZC3HAV1 Isoform 2 GG f	cggaccCACCTGCaaaaATGGtggcggacccggaggtgt
	912 ZC3HAV1 Isoform 2 GG r	cggaccCACCTGCaaaaACCCctctggccctctcttcatctgc
making GG vectors	919 J23119 + iGEM RBS	ttgacagctagctcagtcctaggtataatgctagctactagagatttaat
	920 J23119 f	AAAAAAAAGGTCTCAatggaaaaGCAGGTGgtttgacagctagctcagtc
	921 J23119 r	AAAAAAAAGGTCTCAcaactacctcctattaaatctctagtagctagcattatac
	922 spispink f	AAAAAAAAGGTCTCAgttgatgtcgcactcaaaacaag
	923 spispink r	TTAAAAAAAAGGTCTCATCTTACCCTTTTGCAGGTGA
	924 pet28 f	AAAAAAGGTCTCAaagatcCGGCTGCTAACAAAG
	925 pet28 r	AAAAAAAAGGTCTCAccatTCCACCGGTTTGTTCCTG
	1209 N-term ALFA f	aaaaggtctccaccatgAGCAGGCTGGAGGAG
	1210 N-term ALFA r	ttttggtctcaccataggCTCGGTCAGCCTCCT
	1026 BB lenti for GG	tgtgtgggagggctaataaagcgtctggaacaatcaacctctggattacaaaatttg
	1027 bb for GG rev	cCACCTGCttttccatatggtgatggtgatggtggaccatGGTGGCGCTAGAATCTTC
	1028 DO lenti f	atggtccaccatcacca
	1029 T2A for GG f	gggcctttctgcgtttatagtCACCTGCaaaaGGgtccgagggcagaggaagtct
	1030 BSD into GG lenti	ttttgtaatccagaggttgattgttccagacgctttattagccctcccacacataa
	1031 pIndu BB GG r	TGCttttccatatggtgatggtgatggtggaccatGGTGGCttgatgctagccaattctc
	1032 pInd GG BB f	ggcctttctgcgtttatagtCACCTGCaaaaGGgtaataagtttagtaatgaaccggtcc
in vitro translation constructs	1136 ß-Glob BB GG r	TTTTCGTCTCTATGGTGTCTGTTTGAGGTTGCTAG
	1137 ß-Glob BB GG f	AAAACGTCTCAGGGTAAGCTCGCTTTCTTGCC
	1138 SARS-CoV-2 nsp9 f GG	aaaacgtctcaccgaataatgagcttagtcctgttgcac
	1139 SARS-CoV-2 RdRP int r GG	ttttcgtctctAcccagccctggtcaaggttaatatagg
	1140 FLAG f GG	aaaacgtctccccatgTTCgattacaaggatgacgatgac
	1141 FLAG r GG	ttttcgtctcatcggtttatcatcgtcatccttatagtctttatcg
	1145 nsp10 rev GG	ttttcgtctcattgtgcatcagctgactgaag
	1146 RdRP f GG	aaaaacgtctcagttttgctaaattcctaaaaactaattgttgtc
	1147 SARS-CoV-2 0-frame f	aaaaacgtctcaacaatcgttCCTCaACGGGTTTG
	1148 SARS-CoV-2 PRF muts r	ttttcgtctcaaaaccagctactttatcattgtagatgtcaaaagc
	1149 SARS-CoV-2 PK mut f	aaaaacgtctcaacaatcgttCttGaACGGGTTTGC
MST + RNA antisense purification	737 MZ ivt PD CoV f	CTTAATACGACTCACTATAGGGGTTTCGTTTTTAAACGGGTTTGCGG
	738 MZ ivT PD CoV r	GGCCCACGTAGCGTCACCCTTTCCAGCTACTTTATCATTGTAGATGTCAAAAGC
	231 MZ_PD contr. F	GAG AGA GAG AGA GAG AGA GAG AGA GAG AGA GAG AAG AAA GGG TGA CGC TAC
	232 MZ_PD contr. R	TCT CTC TCT CTC TCT CTC TCT CTC TCT CTC TCT CTC CCC TAT AGT GAG TCG TAT TA
	217 MZ_PD Biotin	[Bio] GGC CCA CGT AGC GTC ACC CTT TC
	1192 scrambled cov 1 r	GGC CCA CGT AGC GTC ACC CTT TCC GTT CGG GAC GCG CGG ACT AAC TAA CGA ATC TAA CAC ACC GCA ATG
	1193 scrambled cov 1 f	TGA ATT GTA ATA CGA CTC ACT ATA GGG GCA TCA CGA TTT GTT TTG GTA GCC CCC ATC ATA GAG AAG TTT ATA TTA AGG AA
	1194 scrambled cov 1 (fragment)	CAT CAT AGA GAA GTT TAT ATT AAG GAA GCA GAG GTC CAC AGT CAT TGC GGT GTG TTA GAT
	1197 ivt MZ SL1 r	TCA TTA CGA CAT CAG TAC TAG TGC CTG
	1198 ivt MZ SL1+2+3 r	TCA TTA GTG TAA GAC GGG CTG CAC
	1199 ivt MZ SL1+2 r	CAG CTA CTT TAT CAT TGT AGA TGT CAA AAG CC
	737 MZ ivt PD CoV f	CTTAATACGACTCACTATAGGGGTTTCGTTTTTAAACGGGTTTGCGG
qRT- PCR	1064 qRT HNRNPH1 f	ATTCAAAATGGGGCTCAAGGTAT
	1065 qRT HNRNPH1 r	GTGTCAGGACTATTTGGACCAG
	1066 qRT HNRNPH2 f	GAAGCATACAGGTCCGAATAGC
	1067 qRT HNRNPH2 r	CGCCCCTGAAAGTCCACTG
	1068 qRT NAF1 f	ATATTCGAGATATTTGGACCTGTTG
	1069 qRT NAF1 r	CTCTGGTGGTGGTTCCTGAT
	1070 qRT NHP2 f	CTTCTGTCCATCAGTGCCAT
	1071 qRT NHP2 r	AGCATTTACTTTCCCCACCC
	1072 qRT RAB11B f	TCAGATCTGGGACACTGCTG
	1073 qRT RAB11B r	GGCTGAGGTCTCAATGAAGG
	1076 qRT SRBD1 f	GGCTTCATCAGAATCAACCAG
	1077 qRT SRBD1 r	CCTCATACAGTGTCCCTCCAA
	1080 qRT ZAP f	GCTGAGTTTCCAAGGGATGAT
	1081 qRT ZAP r	GGCTCCAGATTCACGAGTGAC
	1084 qRT GAPDH f	TGGCCTTCCGTGTTCCTAC
	1085 qRT GAPDH r	GAGTTGCTGTTGAAGTCGCA

## Sheet: Antibodies
Antibodies used in this study
name	target	host	application	manufacturer	catalog number
DDDDK tag antibody	FLAG tag	mouse	WB	Abcam	ab49763
ZC3HAV1 Polyclonal antibody	ZAP	rabbit	WB, IP	Proteintech	16820-1-AP
Anti-beta Actin antibody	beta actin	mouse	WB	Abcam	ab6276
RPS6 Polyclonal Antibody	RSP6	rabbit	WB	Proteintech	14823-1-AP
RPL4 Monoclonal Antibody	RPL4	mouse	WB	Proteintech	67028-1-Ig
normal rabbit IgG	-	rabbit	IP	Cell Signaling	#2729
RyDEN Polyclonal antibody	Shiftless	rabbit	WB	Proteintech	27865-1-AP
IRDye® 800CW Goat anti-Rabbit IgG	rabbit IgG	goat	WB	Odyssey	926-32211
IRDye® 680RD Donkey anti-Mouse IgG	mouse IgG	donkey	WB	Odyssey	926-68072

## Sheet: Bacterial strains and cell line
Bacterial strains + cell lines used in this study
name	source	genotype	used for
Top10F’	gift from Prof. Dr. Jörg Vogel	F ́{lacIq Tn10 (TetR)} mcrA ∆(mrr-hsdRMS-mcrBC) Φ80lacZ∆M15 ∆lacX74 recA1 araD139 ∆(ara-leu)7697 galU galK rpsL endA1 nupG	plasmid maintenance
Rosetta2	Merck	F- ompT hsdSB(rB- mB-) gal dcm pRARE2 (CamR)	protein expression
HEK293	gift from Prof. Dr. Jörg Vogel	–	transfections, lentivirus production
Huh7	gift from Dr. Mathias Munschauer		SARS-CoV-2 infections
Calu-3	ATCC HTB-55
