# Supplementary material for: Revealing the host antiviral protein ZAP-S as an inhibitor of SARS-CoV-2 programmed ribosomal frameshifting
Source: Research Square preprint supplement (doi:10.21203/rs.3.rs-563757/v1), 2021-06-01
Supplement: Supplementary file 4 [file 52d8f6dcba29243ffc28b1ce.docx]

|  | | no ZAP-S |  | with ZAP-S |
| --- | --- | --- | --- | --- |
| Unfolding force, pN | peak 1 | 14.0 ± 1.2 |  | 13.8 ± 1.6 |
|  | peak 2 | 22.7 ± 2.9 |  | 19.0 ± 1.4 |
| Refolding force, pN | peak 1 | 11.5 ± 1.5 |  | 7.7 ± 2.4 |
| ΔssLc, nm | peak 1 | 15.9 ± 2.2 |  | 17.6 ± 3.4 |
|  | peak 2 | 33.5 ± 3.3 |  | 30.4 ± 0.9 |
| Total ssLc, nm | peak 1 | 34.4 ± 2.8 |  | 35.8 ± 4.7 |

**Supplementary Table 5. Summary of the optical tweezers force-ramp probing of SARS-CoV-2 pseudoknot RNA without (no ZAP-S) and with ZAP-S.** Mean and standard deviation of unfolding or refolding forces were obtained by fitting the histograms to gaussian functions. Contour lengths of single stranded regions for each step (ΔssLc) and the total contour lengths of single stranded regions were calculated by fitting the force-distance curves to a worm-like chain model. Histograms of these contour length values were fitted with gaussian functions to yield the mean and standard deviation for each peak.
