# Supplementary material for: Revealing the host antiviral protein ZAP-S as an inhibitor of SARS-CoV-2 programmed ribosomal frameshifting
Source: Research Square preprint supplement (doi:10.21203/rs.3.rs-563757/v1), 2021-06-01
Supplement: Supplementary file 7 [file 6d6fe023ffaeb05982a85dce.xlsx]

## Sheet: Sheet1
no Benzonase		+ Benzonase
Gene names	log2 enrichment	Gene names	log2 enrichment
ZC3HAV1	10.8768	ZC3HAV1	10.1554
SHMT2	8.58202	SEC16A	9.35332
SEC16A	8.39876	RPL10A	7.28208
RPL15	7.34856	RPLP0;RPLP0P6	7.06236
RPLP2	7.26034	RPL9	7.05377
RPL5	7.10442	RPS16	6.96213
RPL10A	6.88532	SHMT2	6.90673
PABPC1;PABPC3	6.66587	RPL12	6.46512
EIF4H	6.19907	C7orf50	6.13327
RPL35A	6.19216	EIF4H	6.03876
RPS12	5.89576	HNRNPM	5.89704
UBTF	5.83564	BANF1	5.84223
RPL12	5.79113	UBTF	5.79273
RPL30	5.78666	HIST2H3PS2	5.771
TRIM21	5.71099	DDX21	5.65086
PCM1	5.69205	RPS12	5.62899
RPLP0;RPLP0P6	5.642	RPS5	5.59276
RPL7	5.61275	KIAA1217	5.54357
RPL14	5.55098	SERBP1	5.53949
SRSF1	5.50243	SPATS2L	5.41606
DDX21	5.50101	RPLP2	5.39348
RPL6	5.45835	EBNA1BP2	5.35145
RPL29	5.44131	LMNA	5.31879
TFPI2	5.40736	RPL7	5.30822
DKC1	5.35237	RPL30	5.17758
SFPQ	5.34572	BRIX1	5.16478
RPS16	5.3425	RPL4	5.061
IGF2BP3	5.34177	TRIM21	5.0601
PABPC4	5.33728	CHCHD1	5.01758
RPL13A;RPL13a	5.26572	NOP2	4.99882
SEC13	5.22646	RPL15	4.95435
KIAA1217	5.21042	IGF2BP3	4.91611
RPS28	5.12602	GNB2L1	4.87378
ZC3HAV1	5.06645	RPS21	4.85919
SUGP2	4.94045	RPS19	4.62726
GNB2L1	4.9183	RPL18A	4.59711
F2	4.89864	SRRM2	4.50071
LARP1	4.70196	LARP1	4.42241
ATRX	4.60249	RPL11	4.29714
RPL36	4.53176	SMARCA5	4.22541
SERPINC1	4.50625	ACIN1	4.20911
RPL7A	4.46472	RPL35A	4.18922
SPATS2L	4.43978	RPL36	4.17364
RPL4	4.39123	NCL	4.06372
HNRNPC	4.38674	RPSA	4.05863
SRRM2	4.35673	TRA2A	4.04467
RPLP1	4.16274	NOP10	4.04186
RPS5	4.15054	TRA2B	4.04125
NCL	3.98743	RPS28	4.00333
RPS21	3.87521	DDX27	3.9619
NRBF2	3.83097	LYAR	3.87157
RPSA	3.79849	GNL3	3.82934
ACIN1	3.74987	SRSF10;FUSIP1	3.8129
FBLL1	3.74763	CBX5	3.76779
GAPVD1	3.73681	RPL6	3.76711
BRIX1	3.731	SUGP2	3.74907
ILF2	3.69915	LAMC2	3.7347
TRA2A	3.69672	HNRNPC	3.65418
SERBP1	3.6921	MRPS26	3.65135
N	3.67125	DHX15	3.61216
RPL18A	3.61213	HNRNPF	3.57563
TRA2B	3.60143	MRPS22	3.4772
HNRNPR	3.58634	PGAM5	3.47519
H1FX	3.5173	RPF2	3.43005
EBNA1BP2	3.51526	ATRX	3.42219
RPS3	3.47053	VASP	3.34083
NONO	3.45834	N	3.33478
MATR3	3.44964	DKC1	3.30307
RPL11	3.44484	CDSN	3.26598
GNL3	3.3754	SFPQ	3.2351
VASP	3.36054	NOP56	3.19106
NOP2	3.35843	PWP1	3.14043
RPS20	3.27431	EIF6	3.06636
NHP2	3.24614	F2	3.05365
CUX1	3.24	H2AFY	3.03848
SRSF10;FUSIP1	3.23303	RPL28	3.02596
RPL3	3.13668	SRSF1	3.01974
C7orf50	3.04829	SERPINC1	3.0063
HNRNPUL1	3.01833	ERBB2	2.97141
PRPF19	2.97694	HIST1H2AJ;HIST1H2AH;H2AFJ;HIST2H2AC;HIST1H2AC;HIST3H2A;HIST2H2AA3;HIST1H2AD;HIST1H2AG;HIST1H2AB;HIST1H2AA;H2AFX	2.9466
DDX27	2.9692	TRIM28	2.92649
NPM1	2.95452	DDX24	2.906
SRRM1	2.93416	YWHAB	2.86804
RALY	2.90987	SRSF6	2.86388
DDX18	2.89736	RPL18	2.83184
SRSF7	2.82797	SRRM1	2.8058
SRSF6	2.79378	PCM1	2.78669
BPTF	2.77595	NRBF2	2.78377
RPL19	2.74867	RPL13A;RPL13a	2.7445
SRSF9	2.72815	SON	2.66593
PURB	2.72708	PRDX1	2.65851
HNRNPM	2.70646	SRSF4	2.65612
RPS19	2.7042	RPL5	2.58719
HELZ2	2.66057	RPL3	2.58718
LYAR	2.6334	SRSF9	2.46186
ERBB2	2.6236	BAG2	2.43998
NOP10	2.59963	PKM	2.43333
G3BP2	2.57786	GAPVD1	2.43109
HP1BP3	2.57001	MRPS35	2.37776
GTPBP4	2.54467	KNOP1	2.37498
PWP1	2.52796	NHP2	2.36522
RPF2	2.48479	RPL7A	2.32926
GRWD1	2.38247	RPS3	2.32652
GRB7	2.37476	LSR	2.31488
MRPS14	2.3551	RALY	2.31361
SRSF4	2.34514	LAMB3	2.26516
FAM83G	2.34126	PDCD11	2.24733
NOP56	2.31524	MATR3	2.2458
ETFA	2.31116	XRN2	2.2239
AHNAK2	2.29785	MRPL24	2.20563
C3	2.29613	RPL21	2.17316
H1F0	2.23591	MRPS23	2.16644
CLINT1	2.23018	RPL19	2.15882
PGAM5	2.1999	U2AF2	2.15427
RPL9	2.19311	GRB7	2.15266
LMNA	2.14748	PURA	2.06346
RSL1D1	2.1395	RPL13	2.00497
HIST1H1C	2.12946	NKRF	2.00408
YTHDC1	2.11815	KRI1	1.99829
LAMB3	2.11549	RPS8	1.99689
ELAVL1	2.08781	SNRNP70	1.95766
EEF1A1P5;EEF1A1	2.07554	JUP	1.93879
ATAD3A;ATAD3B	2.069	HNRNPH1	1.91574
G3BP1	2.05464	KCTD15	1.89753
SYNE2	2.01812	OASL	1.86937
RPL37	2.00385	RPL8	1.86644
RPL18	1.95515	ACTG1;ACTB	1.85403
CYR61	1.92004	NPM1	1.82089
RPL28	1.91399	CDC5L	1.79174
DAZAP1	1.90828	SRSF7	1.77356
C5	1.88617	CLINT1	1.74745
RPS25	1.86803	RPS25	1.73106
PCBP1	1.82594	YTHDC1	1.70848
GRN	1.79074	WTAP	1.69577
POP1	1.77236	SRSF5	1.65401
WDR46	1.76251	RPL37	1.65385
MRPS34	1.75992	IQGAP1	1.64258
HNRNPH2	1.7323	SAP18	1.6264
RPS6	1.72876	TUFM	1.5985
ATF7IP	1.72866	RPS18	1.59024
BEND3	1.72586	MRPS34	1.579
KIAA1211L	1.69591	C5orf24	1.57044
SLC25A5;SLC25A6;SLC25A4	1.66758	GTPBP4	1.56224
STAU1	1.64484	SQSTM1	1.55257
RPL8	1.61709	TCOF1	1.54415
RPL34	1.61375	RPL27	1.52368
TUFM	1.6111	MRPS9	1.47982
SAP18	1.58668	RPL14	1.44602
HNRNPF	1.58582	RPL29	1.44562
RPL13	1.57935	MRPS5	1.42533
RPS8	1.57525	RPL32	1.40661
LAMA5	1.56948	LAMA3	1.402
HNRNPL	1.55368	GAR1	1.39994
RCN2	1.5531	RPL34	1.39692
TUBB	1.53991	HIST1H4A	1.39438
DDX24	1.52325	PPIA	1.37929
RPL32	1.51409	RRS1	1.35341
PES1	1.47248	RPL27A	1.33934
PPIG	1.4688	RPL17;RPL17-C18orf32	1.33424
SLU7	1.43884	RPS20	1.32796
PRRC2C	1.41653	NOL6	1.31387
ILF3	1.37536	RNPS1	1.30728
XRN2	1.37221	RPL35	1.30533
SRSF3	1.34219	RPL10	1.30303
PNN	1.33165	RSL1D1	1.2974
YWHAB	1.30732	ELAVL1	1.22822
HBE1	1.2958	C4B;C4A	1.21769
TOP1	1.29267	WDR46	1.19308
CBX5	1.28803	HNRNPK	1.1891
HOXB6	1.28195	PRPF4B	1.17194
RPS2	1.25472	LSG1	1.1114
RBMXL1	1.23632	SAFB	1.06573
MRPS18A	1.22226	RPS9	1.01258
NIFK	1.20473
CCDC86	1.17148
RRS1	1.16028
SNRPN;SNRPB	1.15931
U2AF2	1.1569
ATRIP	1.14908
CDC5L	1.14802
SYNCRIP	1.13149
RPL27	1.09427
RPS10;RPS10-NUDT3	1.07618
DDX54	1.07523
RPL21	1.06524
TSC1	1.03618
RPL36A;RPL36A-HNRNPH2	1.00727
HIST1H1A	1.0016
