# Supplementary material for: Revealing the host antiviral protein ZAP-S as an inhibitor of SARS-CoV-2 programmed ribosomal frameshifting
Source: Research Square preprint supplement (doi:10.21203/rs.3.rs-563757/v1), 2021-06-01
Supplement: Supplementary file 8 [file ef220361d8bbcfd4d6656ea8.xlsx]

## Sheet: Sheet1
non-infected Calu-3		SARS-CoV-2-infected Calu-3		HEK293
Gene names	mean log2 enrichment	Gene names	mean log2 enrichment	Gene names	mean log2 enrichment
HNRNPF	4.72239	HELZ2	5.21227	HNRNPF	5.63643
GRSF1	4.58921	HNRNPH1	5.05371	HNRNPH2	4.34028
DHX36	4.4129	GRSF1	4.86576	ZNF768	3.69736
MATR3	4.07073	DHX36	4.85757	ZC3HAV1	3.64039
HNRNPH1	3.92661	HNRNPH2	4.36455	POP1	3.30308
HNRNPH2	3.88698	HNRNPF	4.34035	DHX36	3.14083
ELAVL1	3.53536	TRIM56	3.68007	ZNF229;ZNF227;ZNF285;ZNF664;ZNF736;ZNF222;ZNF320;ZNF93;ZNF214;ZNF45;ZNF234;ZNF225;ZNF224;ZNF888;ZNF235;ZNF267;ZNF226;ZNF112	2.90363
RBM45	3.49364	LAMA5	3.62371	TFRC	2.84079
LAMA5	3.36166	ZC3HAV1	3.57077	NHP2	2.84035
POP1	3.21914	ZNF787	3.5646	NAF1	2.74841
TRIM56	2.84921	MATR3	3.53752	RAB11B;RAB11A	2.65063
ZNF787	2.79909	ELAVL1	3.53726	GPATCH4	2.61526
CHD2	2.69614	POP1	3.4373	HNRNPH1	2.59324
RBBP4	2.64314	DAP3	3.02209	H1FX	2.54826
ZC3HAV1	2.48548	IFIT5	3.02033	ZNF574	2.40417
DAP3	2.16429	SNRPC	2.84941	ZNF346	2.38852
CACTIN	2.10447	RBM15B	2.32912	SURF6	2.38185
SSB	1.97984	FUBP1	2.30892	GNL3	2.37528
RBM15B	1.83872	KRR1	2.01747	SPATS2L	2.29425
MRPS7	1.785	SSB	2.00651	MATR3	2.29381
SNRPC	1.75611	HMGB3	1.97155	MMTAG2	2.29265
PTBP3	1.75543	RPS13	1.91273	GNL2	2.21219
EEF1D	1.73721	PAPD4	1.89697	ZBTB11	2.18466
ZFR	1.66724	CHERP	1.83043	RSL1D1	2.16842
ZNF512	1.66635	LARP7	1.76367	IGF2BP1	2.12242
BOP1	1.42854	RCC2	1.75745	ELAVL1	2.11175
MAP4	1.40614	PTCD3	1.75275	HIST2H2BE;HIST1H2BB;HIST1H2BO;HIST1H2BJ;HIST1H2BN;HIST3H2BB;HIST1H2BL;HIST1H2BM;HIST1H2BH;HIST2H2BF;HIST1H2BC;HIST1H2BD;HIST1H2BK;H2BFS	2.10955
DNAJB11	1.40157	SURF6	1.70592	DDX24	2.03341
MRPL12	1.38953	MRPS23	1.6767	TRIM28	2.007
HMGB3	1.37648	ZFR	1.65492	HIST1H1C	1.97841
MRPS18B	1.32926	AP2M1	1.58384	HIST1H2AJ;HIST1H2AH;H2AFJ;HIST2H2AC;HIST1H2AC;HIST3H2A;HIST2H2AA3;HIST1H2AD;HIST1H2AG;HIST1H2AB;HIST1H2AA;H2AFX;H2AFV;H2AFZ	1.95779
RPS13	1.31725	CYR61	1.57682	DKC1	1.94244
SRSF6;SRSF4	1.30346	DDX21	1.53185	VIM	1.89014
DCD	1.29391	FAU	1.53003	DDX21	1.87641
DNAJA3	1.28826	RBM45	1.46657	YTHDC2	1.87521
DSG1	1.2758	NOL6	1.43531	PWP1	1.85216
IGF2BP2	1.26484	ZC3H4	1.42777	WDR12	1.84183
FUBP1	1.23617	SF3B5	1.39554		1.82163
IGF2BP1	1.23499	RPS24	1.35515	PES1	1.78565
MRPS23	1.15393	CFAP20	1.35334	DDX50	1.77182
PRPF6	1.15035	MRPS35	1.34507	RAB1A;RAB1B;RAB1C	1.75935
MAFF	1.13726	DHX30	1.3201	PRRC2C	1.72408
FAU	1.05917	SF1	1.31399	DDX52	1.70447
		PEO1	1.29474	RPL7L1	1.70106
		DYNLL1;DYNLL2	1.28882	SSB	1.68425
		CORO1C	1.24051	KNOP1	1.67819
		MRPS21	1.23516	SNRPA	1.67565
		HNRNPL	1.23017	U2AF1	1.67276
		MRPL4	1.22578	CTCF	1.66763
		G3BP2+B66A32A2A27:B59	1.20127	PRRC2A	1.66749
			1.19514	SF3B1	1.58779
		LAMB3	1.18931	DHX15	1.58261
		GNL2	1.181	RBM34	1.56593
			1.17782	PRKRIR	1.56527
		MRPS9	1.17485	ZNF326	1.54945
		RPS26;RPS26P11	1.16688	IGF2BP3	1.54536
		RBM47	1.15726	LIN28B	1.52762
		SLTM	1.15527	LARP7	1.51923
		RPS9	1.14365	CHERP	1.50399
		HMGB2	1.12113	SF3B3	1.49155
		RPL36A;RPL36A-HNRNPH2	1.11106	ZCCHC6	1.46683
		IGF2BP1	1.10587	MYEF2	1.4568
		MRPL44	1.09823	RBM28	1.44264
		PTBP3	1.0952	DGCR8	1.42395
		MAP4	1.0868	UBA52;UBB;UBC	1.39984
		RPS29	1.07404	SNRPD2	1.37456
		IGF2BP2	1.04336	FAM207A	1.34554
		EIF2S3;EIF2S3L	1.03318	DROSHA	1.34186
		DICER1	1.03169	SF1	1.3254
		UGT1A6;UGT1A8;UGT1A10;UGT1A7;UGT1A9;UGT1A1;UGT1A5;UGT1A3;UGT1A4	1.02039	SF1	1.32155
		MRPL12	1.01831	SNRPD3	1.27899
		RPL18A	1.00722	SF3B2	1.27746
				NONO	1.27724
				SAFB	1.267
				C8orf33	1.24834
				HNRNPM	1.24716
				IGF2BP2	1.24231
				SNRNP70	1.2375
				CANX	1.20342
				RRP1B	1.20184
				NSA2	1.18668
				POP4	1.18291
				ZNF668	1.18268
				SNRPG;SNRPGP15	1.18145
				DDX54	1.18005
				PGRMC1	1.17904
				U2AF2	1.16629
				NIFK	1.16086
				SFPQ	1.1577
				SNRPN;SNRPB	1.15711
				UTP14A	1.15463
				SNRPF	1.14705
				SNRPD1	1.12774
				RRS1	1.12234
				U2SURP	1.11278
				RSBN1L	1.11139
				SKP1	1.10887
				RBM17	1.08808
				XRN1	1.07671
				C18orf21	1.07497
				ZNF771	1.07281
				SRP14	1.06245
				HNRNPUL1	1.04973
				HOXA5;HOXB8;HOXC6;HOXB7;HOXC5;HOXB6;HOXA7;HOXA6;HOXC8;HOXB9;HOXC9;HOXB5;HOXD9	1.0386
				DDX5	1.00753
				DDX17	1.0026
